# Supplementary material for: Interference free ultratrace beryllium determination in alkaline effluents of beryllium processing plants by graphite furnace atomic absorption spectrometry after a novel graphene oxide-assisted dispersive micro solid phase extraction without using a chelating agent
Source: Royal Society of Chemistry journal article supplement (doi:10.1039/d4ja00012a), 2024-01-01
Supplement: d4ja00012a1.pdf [file d4ja00012a1.pdf]

**Supplementary information:**

**Table captions:**

**Table S1a.** Optimized temperature program used for the determination of beryllium in 10% nitric acid using CS–ETAAS.

**Table S1b.** Optimized temperature program used for Ir coating on pyrocoated graphite platform.

**Figure captions:**

**Fig. S1.** Speciation plots of beryllium in aqueous medium at concentration of Be 1  $\mu$ M (a), 100  $\mu$ M (b) and 1mM (c).

**Table S1a** Optimized temperature program used for the determination of beryllium in 10% nitric acid using CS–ETAAS.

| Step        | Temperature/°C | Ramp/°C | Hold/s | Ar flow/mL min <sup>-1</sup> |
|-------------|----------------|---------|--------|------------------------------|
| Drying – 1  | 80             | 5       | 20     | 250                          |
| Drying – 2  | 110            | 10      | 10     | 250                          |
| Pyrolysis   | 1700           | 500     | 10     | 250                          |
| Atomization | 2300           | 1500    | 5      | 0 (read)                     |
| Cleaning    | 2450           | 1500    | 4      | 250                          |

**Table S1b** Optimized temperature program used for Ir coating on pyrocoated graphite platform.

| Step        | Temperature/°C | Ramp/°C | Hold/s | Ar flow/mL min <sup>-1</sup> |
|-------------|----------------|---------|--------|------------------------------|
| Drying – 1  | 90             | 5       | 40     | 250                          |
| Drying – 2  | 110            | 1       | 40     | 250                          |
| Drying – 3  | 130            | 1       | 40     | 250                          |
| Pyrolysis   | 1200           | 300     | 26     | 0                            |
| Atomization | 2100           | 500     | 8      | 0                            |
| Cleaning    | 2100           | 0       | 45     | 100                          |

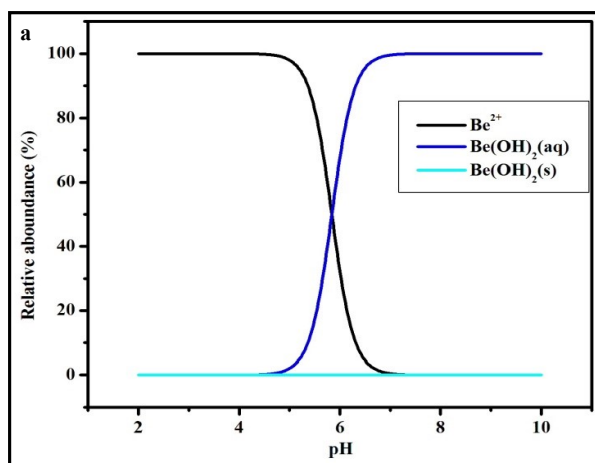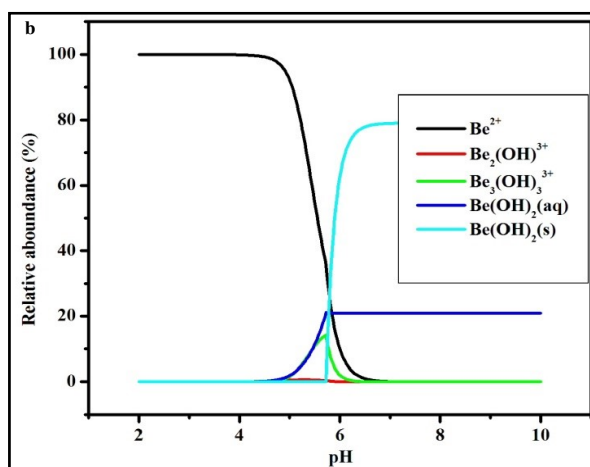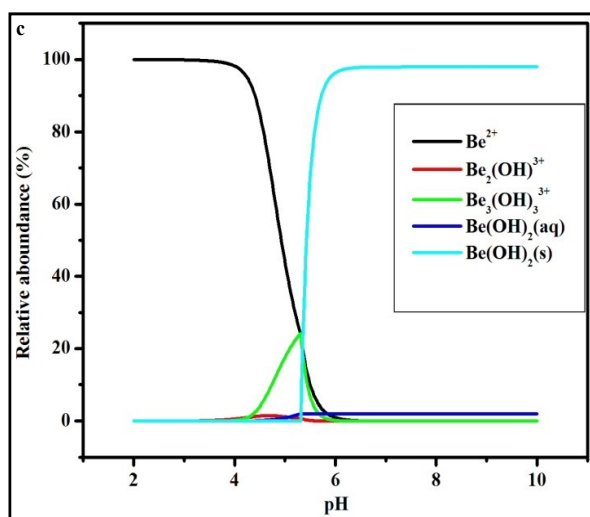

**Fig. S1.** Speciation plots of beryllium in aqueous medium at concentration of Be 1 $\mu$ M (a), 100  $\mu$ M (b) and 1mM (c).
